# Supplementary material for: Direct Evidence on Effect of Oxygen Dissolution on Thermal and Electrical Conductivity of AlN Ceramics Using Al Solid-State NMR Analysis
Source: MDPI journal article supplement (doi:10.3390/ma15228125), 2022-11-16
Supplement: s1 [file s1]

Supplementary Materials

# Direct Evidence on Effect of Oxygen Dissolution on Thermal and Electrical Conductivity of AlN Ceramics using Al Solid-State NMR Analysis

Jaegyeom Kim <sup>1,†</sup>, Jong-Young Kim <sup>1,†</sup>, Heewon Ahn <sup>1</sup>, Mu Hyeok Jeong <sup>1,2</sup>, Eunsil Lee <sup>1,2</sup>, Keonhee Cho <sup>1</sup>, Sung-Min Lee <sup>1</sup>, Wooyoung Shim <sup>2</sup> and Jae-Hwan Pee <sup>1,\*</sup>

<sup>1</sup> Icheon Branch, Korea Institute of Ceramic Engineering and Technology(KICET), 3321, Gyeongchung Rd., Sindun-Myeon, Icheon-si, Gyeonggi-do 467-843, Republic of Korea

<sup>2</sup> Department of Materials Sciences & Engineering, Multi-scale Materials Laboratory, Yonsei University, 50, Yonsei-ro, Seodaemun-gu, Seoul 37022, Republic of Korea

\* Correspondence: pee@kicet.re.kr; Tel.: +82-31-645-1423

† The authors equally contributed as the first author.

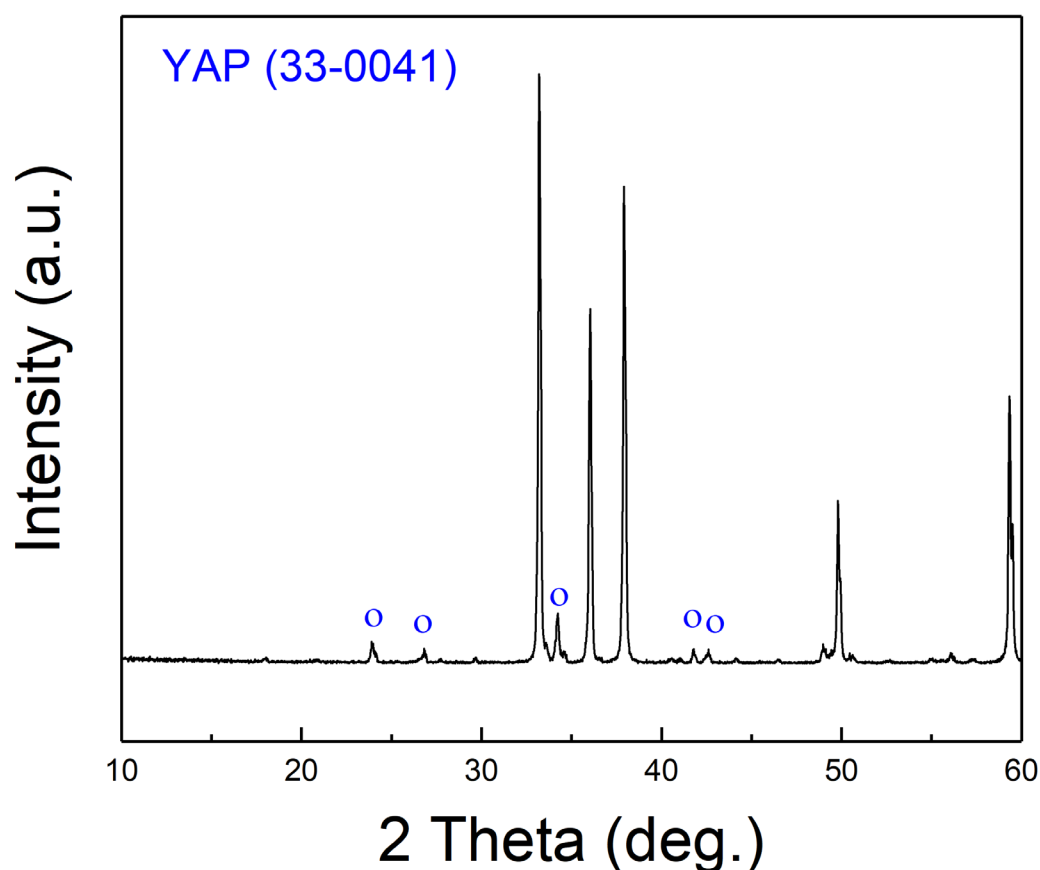

**Figure S1.** XRD pattern of sintered commercial AlN.

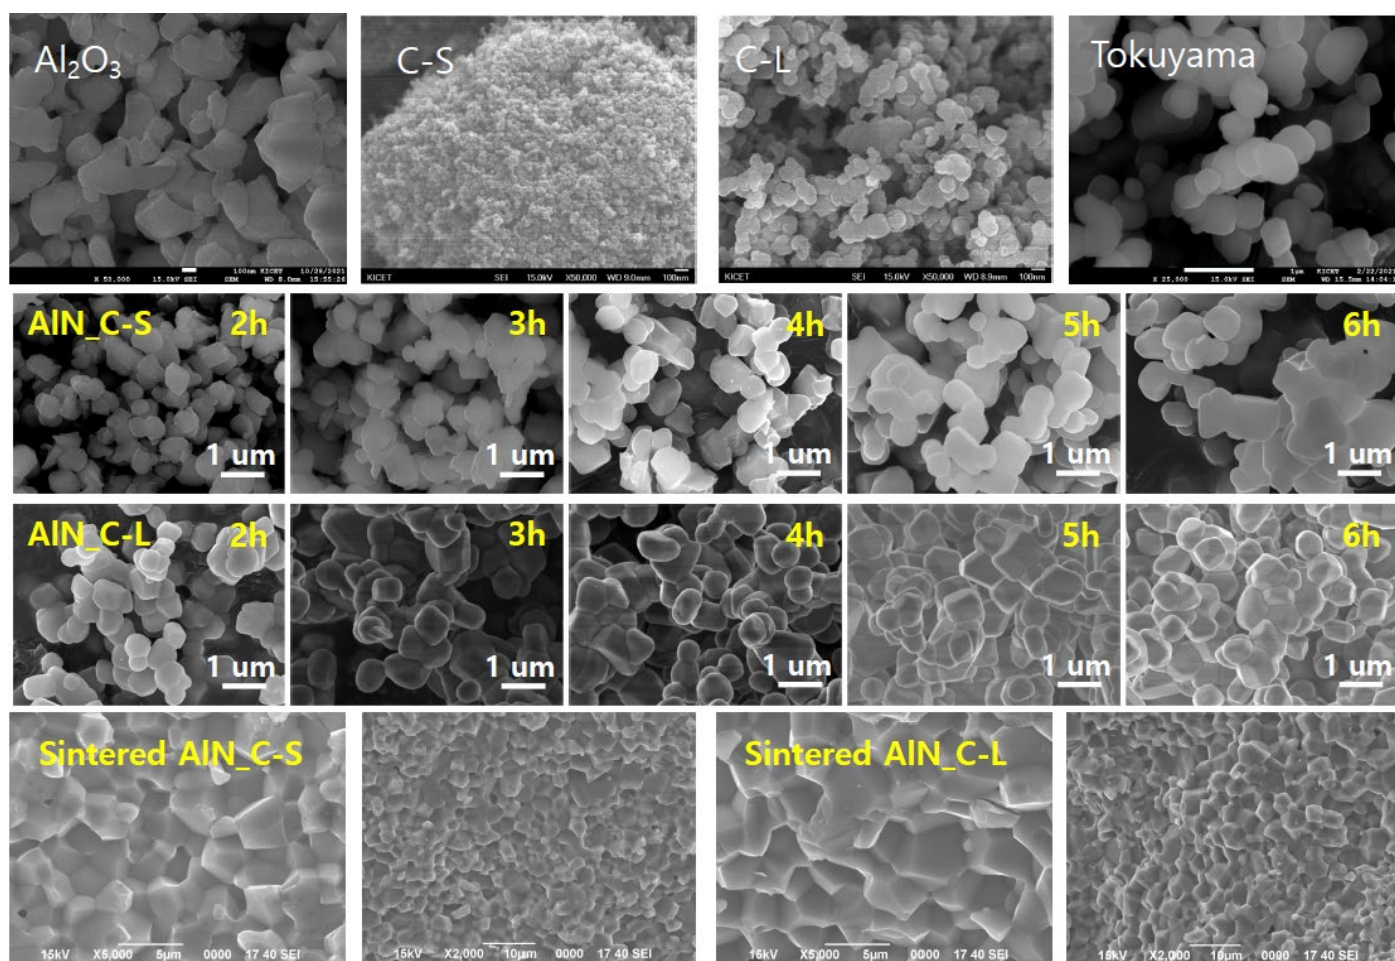

Figure S2. SEM images for  $\text{Al}_2\text{O}_3$ , carbon black, AlN raw materials, and sintered AlN.

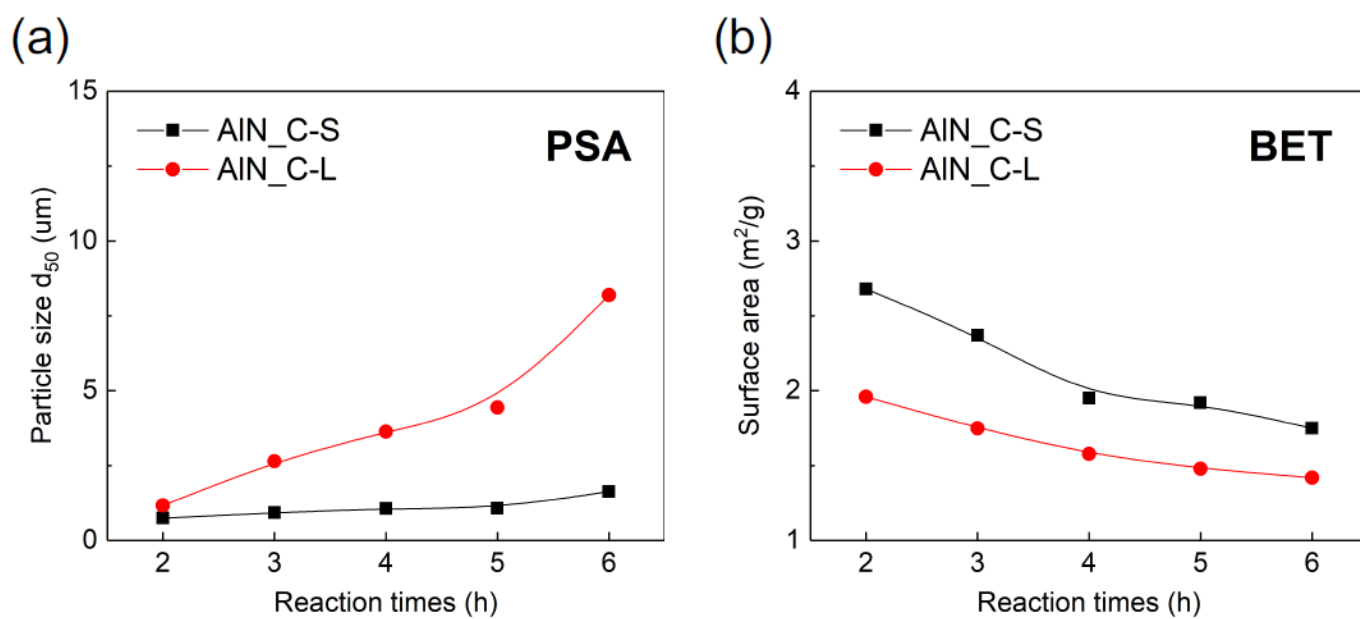

Figure S3. Particle size and BET data of AlN\_C-S/C-L.
